# Supplementary material for: Bee sting envenomation severe cases in Manaus, Brazilian Amazon: clinical characteristics and immune markers of case reports
Source: PubMed Central journal article supplement (PMC7747811; doi:10.1590/0037-8682-0319-2021), 2020-12-21
Supplement: 1678-9849-rsbmt-54-e20200319-suppl1.pdf [file 1678-9849-rsbmt-54-e20200319-suppl1.pdf]

**Supplementary material: TABLE 1:** Laboratory parameters obtained from Case 1.

| Parameters                               | April 25 <sup>th</sup> , 2019 | April 26 <sup>th</sup> , 2019 |
|------------------------------------------|-------------------------------|-------------------------------|
| Hemoglobin (g/dL)                        | 15.5                          | 15.7                          |
| White blood cells ( $10^3/\text{mm}^3$ ) | 27.9                          | 38.4                          |
| Platelets ( $10^3/\text{mm}^3$ )         | 438.9                         | 328.6                         |
| Creatinine (mg/dL)                       | 4.1                           | 7.1                           |
| Alkaline phosphatase (IU/L)              | 251                           | 340                           |
| Gamma-glutamyl transferase (IU/L)        | 26                            | 36                            |
| Total bilirubin (mg/dL)                  | 1.33                          | 1.23                          |
| Direct bilirubin (mg/dL)                 | 0.02                          | 0.02                          |
| Indirect bilirubin (mg/dL)               | 1.31                          | 1.21                          |
| Glucose (mg/dL)                          | 344                           | 149                           |
| Potassium (mmol/L)                       | 6.9                           | 7.9                           |
| Sodium (mmol/L)                          | 135                           | 137                           |
| Aspartate aminotransferase (IU/L)        | 513                           | 1998                          |
| Alanine aminotransferase (IU/L)          | 62                            | 384                           |
| Urea (mg/dL)                             | 99                            | 174                           |
| Albumin (g/dL)                           | 4.2                           | 3.5                           |
| Creatine phosphokinase (IU/L)            | 19,995                        | 40,801                        |
| Creatine phosphokinase-MB (IU/L)         | 381                           | 606                           |
| Lactate dehydrogenase (IU/L)             | 1036                          | 8604                          |
| pH                                       | 7.41                          | 7.07                          |
| pCO <sub>2</sub>                         | 22.1                          | 42.9                          |
| pO <sub>2</sub>                          | 69.3                          | 50.3                          |
| sO <sub>2</sub>                          | 93.1                          | 74.6                          |
| Lactate (mg/dL)                          | 44                            | 69                            |
| Base excess (mmol/L)                     | -9.8                          | -16.3                         |
| HCO <sub>3</sub> <sup>-</sup> (mmol/L)   | 13.9                          | 11.9                          |

**Reference values:** Hemoglobin: 13.0-16.0 g/dL; White blood cells: 4.000-10.000/mm<sup>3</sup>; Platelets: 130,000-400.000/mm<sup>3</sup>; Creatinine: 0.5-1.2 mg/dL for adults; Alkaline phosphatase: male  $\leq$ 390 IU/L; Gamma-glutamyl transferase: 7-60 IU/L for males; Total bilirubin: 0.01-1.3 mg/dL; Direct bilirubin: 0.01-0.3 mg/dL; Indirect bilirubin: 0.01-0.7 mg/dL; Glucose: <99 mg/dL; Potassium: 3.6-5.2 mmol/L; Sodium: 135-145 mmol/L; Aspartate aminotransferase: 2-38 IU/L; Alanine aminotransferase: 2-44 IU/L; Urea: 10-45 mg/dL; Albumin: 3.5-5 g/dL; Creatine phosphokinase: 24-190 IU/L; Creatine phosphokinase-MB: 2-25 IU/L; Lactate dehydrogenase: 211-423 IU/L; pH: 7.35-7.45; pCO<sub>2</sub>: 35-45; pO<sub>2</sub>: 80-100; sO<sub>2</sub>: 94-97%; Lactate  $\geq$ 45 mg/dL; Base excess -2 to +2 (mmol/L); HCO<sub>3</sub><sup>-</sup>: 22-26 mmol/L.
