# Supplementary material for: Bee sting envenomation severe cases in Manaus, Brazilian Amazon: clinical characteristics and immune markers of case reports
Source: PubMed Central journal article supplement (PMC7747811; doi:10.1590/0037-8682-0319-2021), 2020-12-21
Supplement: 1678-9849-rsbmt-54-e20200319-suppl2.pdf [file 1678-9849-rsbmt-54-e20200319-suppl2.pdf]

**Supplementary material: TABLE 2:** Laboratory parameters obtained from Case 2.

| Parameters                                            | July 18 <sup>th</sup> ,<br>2019 | July 19 <sup>th</sup> ,<br>2019 | July 20 <sup>th</sup> ,<br>2019 | July 22 <sup>nd</sup> ,<br>2019 | July 23 <sup>rd</sup> ,<br>2019 | July 25 <sup>th</sup> ,<br>2019 | July 26 <sup>th</sup> ,<br>2019 | July 28 <sup>th</sup> ,<br>2019 | July 30 <sup>th</sup> ,<br>2019 | August 1 <sup>st</sup> ,<br>2019 | August 2 <sup>nd</sup> ,<br>2019 |
|-------------------------------------------------------|---------------------------------|---------------------------------|---------------------------------|---------------------------------|---------------------------------|---------------------------------|---------------------------------|---------------------------------|---------------------------------|----------------------------------|----------------------------------|
| Hemoglobin (g/dL)                                     | 10.94                           | 10.99                           | 8.6                             | 7.9                             | 8.0                             | 10.1                            | 10.0                            | 11.39                           | 8.11                            | 8.31                             | 7.90                             |
| White blood cells (10 <sup>3</sup> /mm <sup>3</sup> ) | 37.930                          | 31.520                          | 18.790                          | 20.000                          | 22.350                          | 29.150                          | 34.620                          | 21.920                          | 13.080                          | 12.310                           | 9.856                            |
| Platelets (10 <sup>3</sup> /mm <sup>3</sup> )         | 188.100                         | 196.700                         | 128.400                         | 146.300                         | 120.700                         | 218.300                         | 321.000                         | 537.000                         | 367.400                         | 235.100                          | 238.400                          |
| Creatinine (mg/dL)                                    | 3.7                             | 4.2                             | 3.1                             | 3.7                             | 3.0                             | 4.8                             | 5.3                             | 4.2                             | 3.8                             | 2.1                              | 1.8                              |
| Alkaline phosphatase (IU/L)                           | 378                             | ...                             | ...                             | 221                             | ...                             | ...                             | ...                             | 339                             | ...                             | ...                              | ...                              |
| Amylase (IU/L)                                        | 499                             | ...                             | ...                             | ...                             | ...                             | ...                             | ...                             | ...                             | ...                             | ...                              | ...                              |
| Gamma-glutamyl transferase (IU/L)                     | ...                             | ...                             | ...                             | ...                             | ...                             | ...                             | ...                             | ...                             | ...                             | ...                              | ...                              |
| Glucose (mg/dL)                                       | 128                             | ...                             | ...                             | 119                             | ...                             | ...                             | 86                              | 86                              | ...                             | ...                              | ...                              |
| Potassium (mmol/L)                                    | 5.0                             | 5.3                             | 3.9                             | 3.7                             | 3.5                             | 3.6                             | 3.9                             | 4.0                             | 3.5                             | 4.2                              | 3.8                              |
| Sodium (mmol/L)                                       | 135                             | 132                             | 140                             | 142                             | 140                             | 137                             | 135                             | 137                             | 139                             | 138                              | 139                              |
| Calcium                                               | ...                             | ...                             | 8.4                             | 8.2                             | 8.7                             | 9.4                             | 10.3                            | 10.0                            | 8.9                             | 9.0                              | 8.4                              |
| Magnesium                                             | ...                             | 2.2                             | 2.8                             | 2.5                             | 2.2                             | 2.6                             | 2.4                             | 2.3                             | 1.7                             | ...                              | ...                              |
| Aspartate aminotransferase (IU/L)                     | 4009                            | 4979                            | 1884                            | 976                             | 435                             | 181                             | 97                              | 91                              | 41                              | 36                               | 36                               |
| Alanine aminotransferase (IU/L)                       | 590                             | 818                             | 856                             | 644                             | 520                             | 297                             | 233                             | 187                             | 124                             | 92                               | 92                               |
| Urea (mg/dL)                                          | 162                             | 188                             | 137                             | 131                             | 130                             | 176                             | 135                             | 86                              | 104                             | 97                               | 96                               |
| Albumin (g/dL)                                        | 3.0                             | 3.2                             | 3.5                             | 3.4                             | 3.4                             | 3.1                             | 3.3                             | 3.8                             | 3.4                             | ...                              | ...                              |
| Creatine phosphokinase (IU/L)                         | ...                             | 407.708                         | 99.986                          | 88.874                          | 21.006                          | 6.655                           | ...                             | 882                             | 306                             | ...                              | 208                              |
| Creatine phosphokinase-MB (IU/L)                      | ...                             | 3.888                           | 1.385                           | 691                             | 288                             | 133                             | ...                             | 48                              | 26                              | ...                              | 30                               |
| Lactate dehydrogenase (IU/L)                          | 12.753                          | ...                             | 9.803                           | ...                             | 5.658                           | 4.296                           | ...                             | 3.275                           | 1.726                           | ...                              | ...                              |

**Reference values:** Hemoglobin: 13.0-16.0 g/dL for males; White blood cells: 4.000-10.000/mm<sup>3</sup>; Platelets: 130.000-400.000/mm<sup>3</sup>; Creatinine: 0.3-1.0 mg/dL for children; Alkaline phosphatase: male ≤390 IU/L; Gamma-glutamyl transferase: 7-60 IU/L for males; Glucose: <99 mg/dL; Potassium: 3.6-5.2 mmol/L; Sodium: 135-145 mmol/L; Aspartate aminotransferase: 2-38 IU/L; Alanine aminotransferase: 2-44 IU/L; Urea: 10-45 mg/dL; Albumin: 3.5-5 g/dL; Creatine phosphokinase: 24-190 IU/L; Creatine phosphokinase-MB: 2-25 IU/L; Lactate dehydrogenase: 211-423 IU/L; pH: 7.35-7.45; pCO<sub>2</sub>: 35-45; pO<sub>2</sub>: 80-100; Lactate ≥45 mg/dL; Base excess -2 to +2 (mmol/L); HCO<sub>3</sub><sup>-</sup>: 22-26 mmol/L.
